# Supplementary material
Source: PubMed Central journal article supplement (PMC6016372)
Supplement: NIHMS907676-supplement-supplement_1.pdf [file NIHMS907676-supplement-supplement_1.pdf]

Supplementary Table 1. Characteristics at admission of all patients with ascites who were alive at discharge vs. those who died/discharged to hospice

|                                                            | Alive at discharge<br>(n=623)     | Died or Discharged<br>to hospice<br>(n=95) | p value | Cox p value |
|------------------------------------------------------------|-----------------------------------|--------------------------------------------|---------|-------------|
| Age (years)                                                | 57 ± 9.8                          | 57 ± 11.6                                  | 0.98    | 0.26        |
| Gender (% male)                                            | 402 (64.5%)                       | 63 (66%)                                   | 0.73    | 0.96        |
| Etiology<br>-Related to alcohol<br>-Not related to alcohol | 297 (48%)<br>325 (52%)<br>(n=622) | 46 (48.5%)<br>49 (51.5%)<br>(n=95)         | 0.90    | 0.65        |
| Diabetes (%)                                               | 193 (31.5%)<br>(n=613)            | 32 (33.7%)<br>(n=94)                       | 0.67    | 0.67        |
| On statins (%)                                             | 54 (9%)<br>(n=617)                | 10 (11%)<br>(n=93)                         | 0.53    | 0.73        |
| On beta Blockers (%)                                       | 268 (43%)                         | 39 (41%)                                   | 0.72    | 0.53        |
| History of variceal hemorrhage (%)                         | 150 (24%) (n=615)                 | 16 (17%),<br>(n=94)                        | 0.12    | 0.24        |
| Refractory ascites (%)                                     | 312 (50.1%)                       | 54 (56.8%)                                 | 0.22    | 0.06        |
| HCC                                                        | 58 (9%)                           | 9 (9.5%)                                   | 0.96    | 0.27        |
| Infected on admission (%)                                  | 171 (27%)                         | 31 (32%)                                   | 0.30    | 0.29        |
| BMI                                                        | 29 ± 7                            | 29 ± 6.5                                   | 0.62    | 0.40        |
| Temperature (°F)                                           | 98.1 ± 1                          | 97.9 ± 1.1                                 | 0.06    | 0.04        |
| Heart rate (bpm)                                           | 85 ± 17                           | 88.8 ± 18                                  | 0.06    | 0.13        |
| MAP (mmHg)                                                 | 86.5 ± 14                         | 80.8 ± 13.8                                | <0.001  | 0.02        |
| WBC                                                        | 7.9 ± 5                           | 9.3 ± 6.6                                  | 0.06    | 0.11        |
| Platelet count                                             | 112.7 ± 71.6                      | 111.5 ± 79                                 | 0.88    | 0.86        |
| Albumin (mg/dL)                                            | 2.8 ± 0.6                         | 2.8 ± 0.6                                  | 0.63    | 0.62        |
| Bilirubin (mg/dL)                                          | 5.2 ± 6                           | 8.7 ± 9                                    | <0.001  | 0.01        |
| INR                                                        | 1.6 ± 0.5                         | 1.9 ± 0.6                                  | <0.001  | 0.002       |
| Creatinine (mg/dL)                                         | 1.5 ± 1.3                         | 2.3 ± 1.6                                  | <0.001  | 0.001       |
| Serum Na (mEq/L)                                           | 133.4 ± 5.8                       | 131 ± 6.7                                  | <0.001  | 0.19        |
| Child score                                                | 9.9 ± 1.9                         | 11 ± 2.1                                   | <0.001  | 0.001       |
| MELD                                                       | 19.2 ± 7                          | 25.6 ± 7.6                                 | <0.001  | <0.001      |

|                    |           |          |      |      |
|--------------------|-----------|----------|------|------|
| Esophageal varices |           |          |      |      |
| - No or small      | 293 (66%) | 41 (68%) |      |      |
| - Medium/large     | 149 (34%) | 19 (32%) | 0.75 | 0.65 |
|                    | (n=442)   | (n=60)   |      |      |

New Supplementary Table 2: Predictors of death in patients with ascites (Cox regression analysis)

| Variables on admission entered in model | Parameter Estimate | Standard Error | Chi-Square | Pr > ChiSq       | Hazard Ratio (95% CI)     |
|-----------------------------------------|--------------------|----------------|------------|------------------|---------------------------|
| MAP                                     | -0.00587           | 0.00844        | 0.4838     | 0.4867           | 0.994(0.978,1.011)        |
| Temperature                             | -0.21264           | 0.10321        | 4.2446     | <b>0.0394</b>    | <b>0.808(0.660,0.990)</b> |
| MELD                                    | 0.05852            | 0.01354        | 18.6895    | <b>&lt; 0001</b> | <b>1.060(1.033,1.089)</b> |
| Serum sodium                            | -0.01783           | 0.01648        | 1.1698     | 0.2794           | 0.982(0.951,1.015)        |
| On beta-blockers (no vs. yes)           | 0.11379            | 0.21798        | 0.2725     | 0.6017           | 1.121(0.731,1.718)        |

| Variables on admission entered in model | Parameter Estimate | Standard Error | Chi-Square | Pr > ChiSq    | Hazard Ratio (95% CI)     |
|-----------------------------------------|--------------------|----------------|------------|---------------|---------------------------|
| MAP                                     | -0.00800           | 0.00868        | 0.8488     | 0.3569        | 0.992(0.975,1.009)        |
| Temperature                             | -0.18374           | 0.09088        | 4.0874     | <b>0.0432</b> | <b>0.832(0.696,0.994)</b> |
| Child score                             | 0.17160            | 0.05858        | 8.5800     | <b>0.0034</b> | <b>1.187(1.058,1.332)</b> |
| Serum sodium                            | -0.00616           | 0.01651        | 0.1392     | 0.7091        | 0.994(0.962,1.027)        |
| On beta-blockers (no vs. yes)           | 0.13307            | 0.22313        | 0.3557     | 0.5509        | 1.142(0.738,1.796)        |

Supplementary Table 3. Characteristics at admission of patients with refractory ascites who were alive at discharge vs. those who died/discharged to hospice

|                                                            | Alive at discharge<br>(n=312) | Died or Discharged to<br>hospice<br>(n=54) | <i>p</i> value | Cox <i>p</i> value |
|------------------------------------------------------------|-------------------------------|--------------------------------------------|----------------|--------------------|
| Age (years)                                                | 57.6 ± 9.2                    | 57 ± 12.2                                  | 0.71           | 0.34               |
| Gender (% male)                                            | 198 (63.5%)                   | 38 (70%)                                   | 0.33           | 0.39               |
| Etiology<br>-Related to alcohol<br>-Not related to alcohol | 148 (47%)<br>164 (53%)        | 26 (48%)<br>28 (52%)                       | 0.92           | 0.59               |
| Diabetes (%)                                               | 103 (34%)<br>(n=303)          | 17 (31.5%)<br>(n=54)                       | 0.72           | 0.95               |
| On statins (%)                                             | 35 (11%)<br>(n=308)           | 8 (15%)<br>(n=52)                          | 0.41           | 0.77               |
| On Beta Blockers (%)                                       | 148 (47%)                     | 19 (35%)                                   | 0.10           | 0.11               |
| History of variceal<br>hemorrhage (%)                      | 93 (30%), n=307               | 12 (23%), n=53                             | 0.26           | 0.63               |
| HCC                                                        | 23 (7%)                       | 5 (9%)                                     | 0.58           | 0.05               |
| BMI                                                        | 29 ± 8                        | 29 ± 5                                     | 0.90           | 0.05               |
| Temperature (°F)                                           | 98.1 ± 0.9                    | 97.9 ± 1.1                                 | 0.28           | 0.07               |
| Heart rate (bpm)                                           | 85 ± 17, n=310                | 89 ± 17                                    | 0.13           | 0.21               |
| MAP (mmHg)                                                 | 85.6 ± 14, n=311              | 81 ± 14                                    | 0.024          | 0.27               |
| WBC                                                        | 8.1 ± 5, n=308                | 9.4 ± 7                                    | 0.20           | 0.32               |
| Platelet count                                             | 114 ± 72, n=307               | 110 ± 80                                   | 0.74           | 0.93               |
| Albumin (-g/dL)                                            | 3 ± 0.6, n=291                | 2.8 ± 0.6, n=51                            | 0.71           | 0.17               |
| Bilirubin (mg/dL)                                          | 4.7 ± 6, n=309                | 7.2 ± 7, n=53                              | 0.004          | 0.33               |
| INR                                                        | 1.6 ± 0.5, n=306              | 1.8 ± 0.6, n=52                            | 0.002          | 0.03               |
| Creatinine (mg/dL)                                         | 1.6 ± 1.4, n=311              | 2 ± 1.5                                    | 0.05           | 0.44               |
| Serum Na (mEq/L)                                           | 132.6 ± 6, n=311              | 130.7 ± 6, n=53                            | 0.047          | 0.76               |
|                                                            |                               |                                            |                |                    |
| Child score                                                | 9.9 ± 1.8, n=262              | 11 ± 2.1, n=48                             | <0.001         | 0.02               |
| MELD                                                       | 19.4 ± 7, n=306               | 24.4 ± 7.7, n=52                           | <0.001         | 0.03               |

|                    |           |          |      |      |
|--------------------|-----------|----------|------|------|
| Esophageal varices |           |          |      |      |
| - No or small      | 149 (63%) | 25 (66%) |      |      |
| - Medium/large     | 87 (37%)  | 13 (34%) | 0.75 | 0.73 |
|                    | (n=236)   | (n=38)   |      |      |

Supplementary Table 4. Predictors of death in patients with refractory ascites (Cox regression analyses)

| Variables on admission entered in model | Parameter Estimate | Standard Error | Chi-Square | Pr > ChiSq    | Hazard Ratio (95% CI)     |
|-----------------------------------------|--------------------|----------------|------------|---------------|---------------------------|
| Child_score                             | 0.17515            | 0.07365        | 5.6553     | <b>0.0174</b> | <b>1.191(1.031,1.376)</b> |
| On beta-blockers (no vs. yes)           | 0.45509            | 0.30945        | 2.1628     | 0.1414        | 1.576(0.859,2.891)        |

| Variables on admission entered in model | Parameter Estimate | Standard Error | Chi-Square | Pr > ChiSq | Hazard Ratio (95% CI) |
|-----------------------------------------|--------------------|----------------|------------|------------|-----------------------|
| MELD                                    | 0.03253            | 0.01720        | 3.5760     | 0.0586     | 1.033(0.999,1.068)    |
| On beta-blockers (no vs. yes)           | 0.39213            | 0.30205        | 1.6854     | 0.1942     | 1.480(0.819,2.675)    |

Supplementary Table 5. Parameters measured at admission and at time of beta blocker discontinuation

|                     | At admission<br>(n=151) | At time of BB<br>discontinuation<br>(n=151) | <i>p</i> value <i>p</i> ve |
|---------------------|-------------------------|---------------------------------------------|----------------------------|
| Heart rate (bpm)    | 82 ± 18<br>(n=149)      | 77 ± 16<br>(n=149)                          | 0.0002                     |
| Systolic BP (mmHg)  | 114 ± 19<br>(n=149)     | 103 ± 20<br>(n=149)                         | <0.001                     |
| Diastolic BP (mmHg) | 67 ± 13<br>(n=148)      | 59 ± 13<br>(n=148)                          | <0.001                     |
| MAP (mmHg)          | 83 ± 14<br>(n=148)      | 74 ± 15<br>(n=148)                          | <0.001                     |
| WBC                 | 7.8 ± 4.3<br>(n=122)    | 7.3 ± 4.3<br>(n=122)                        | 0.13                       |
| Platelet count      | 107 ± 62<br>(n=122)     | 95 ± 54<br>(n=122)                          | <0.0001                    |
| Bilirubin (mg/dL)   | 5.8 ± 6.6<br>(n=140)    | 5.9 ± 6.6<br>(n=140)                        | 0.82                       |
| INR                 | 1.7 ± 0.6<br>(n=132)    | 1.8 ± 0.7<br>(n=132)                        | 0.01                       |
| Creatinine (mg/dL)  | 1.8 ± 1.5<br>(n=146)    | 1.9 ± 1.5<br>(n=146)                        | 0.41                       |
| Serum Na (mEq/L)    | 132.9 ± 6.6<br>(n=146)  | 134.3 ± 6.2<br>(n=146)                      | 0.0002                     |
| Child score         | 10.6 ± 2<br>(n=115)     | 10.2 ± 2<br>(n=115)                         | 0.01                       |
| MELD                | 21.5 ± 7.7<br>(n=128)   | 22.2 ± 7.9<br>(n=128)                       | 0.08                       |

Supplementary Table 6. Comparison of characteristics at time of discontinuation of BB vs. those at time of reinitiation in patients with ascites who discontinued BB.

|                     | Discontinued beta-blockers<br>(n=61) | Reinitiated Beta-Blockers<br>(n=61) | <i>p</i> value <i>p</i> ve |
|---------------------|--------------------------------------|-------------------------------------|----------------------------|
| Heart rate (bpm)    | 77 ± 16<br>(n=60)                    | 82 ± 16<br>(n=60)                   | 0.04                       |
| Systolic BP (mmHg)  | 104 ± 21<br>(n=60)                   | 114 ± 15.6<br>(n=60)                | 0.0001                     |
| Diastolic BP (mmHg) | 61 ± 13<br>(n=60)                    | 69 ± 11<br>(n=60)                   | <0.001                     |
| MAP (mmHg)          | 75.4 ± 14.7<br>(n=60)                | 84 ± 11<br>(n=60)                   | <0.001                     |
| WBC                 | 7.01 ± 4.4<br>(n=58)                 | 6.3 ± 3.2<br>(n=58)                 | 0.12                       |
| Platelet count      | 98 ± 48<br>(n=58)                    | 94 ± 55<br>(n=58)                   | 0.77                       |
| Bilirubin (mg/dL)   | 5.0 ± 5.1<br>(n=52)                  | 4.3 ± 4.1<br>(n=52)                 | 0.13                       |
| INR                 | 1.7 ± 0.5<br>(n=47)                  | 1.7 ± 0.4<br>(n=47)                 | 0.65                       |
| Creatinine (mg/dL)  | 1.7 ± 1.3<br>(n=59)                  | 1.7 ± 1.5<br>(n=59)                 | 0.90                       |
| Serum Na (mEq/L)    | 135 ± 5.7<br>(n=59)                  | 135 ± 5.4<br>(n=59)                 | 0.53                       |
| Child score         | 10 ± 1.6<br>(n=44)                   | 9.5 ± 1.5<br>(n=44)                 | 0.02                       |
| MELD                | 20.4 ± 8.7<br>(n=44)                 | 19.7 ± 6.7<br>(n=44)                | 0.43                       |
